# Supplementary material for: Behavioral and Clinical Factors Associated With Depression Among Individuals With Diabetes
Source: Oxford University Press journal article supplement (doi:10.2337/diacare.27.4.914), 2004-04-01
Supplement: 914-sup-katonrevisedtable1.doc [file 914-sup-katonrevisedtable1.doc]

Table 1: Depression and demographic characteristics by depression grouping

| **Variables** | **Total Sample** | **No Depression** | **Minor Depression** | **Major Depression** | **Overall Test Statistics** | **Minor vs. None** | **Major vs. None** |
| --- | --- | --- | --- | --- | --- | --- | --- |
|  | **N = 4,193***  **n (%)** | **N = 3,335 (79.5%)**  **n (%)** | **N = 357 (8.5%) n (%)** | **N = 501 (12%)**  **n (%)** | **Chi Square**  **df = 2** | **Chi Square df = 1** | **Chi Square df = 1** |
| **Female** | 2,042 (48.7) | 1,567 (47.0) | 182 (51.0) | 293 (58.5) | 23.86† | 1.91 | 22.59† |
| **High School or Less** | 1,047 (25.3) | 801 (24.3) | 112 (31.7) | 134 (27.2) | 10.33‡ | 8.94‡ | 1.74 |
| **Unmarried and Not Living as Married** | 1,403 (33.7) | 1,068 (32.3) | 132 (37.2) | 203 (41.0) | 14.89† | 3.30 | 14.41† |
| **Employment – Full or Part Time** | 1,677 (41.2) | 1,339 (41.2) | 126 (36.8) | 212 (44.6) | 4.99 | 2.22 | 1.91 |
| **Caucasian**  **African-American**  **Asian**  **Other** | 3,196 (77.7)  338 (8.2)  369 (9.0)  212 (5.2) | 2,561 (78.2)  256 (7.8)  306 (9.3)  151 (4.6) | 255 (72.2)  34 (9.6)  36 (10.2)  28 (7.9) | 380 (77.9)  48 (9.8)  27 (5.5)  33 (6.8) | 21.66†  (df=6) | 10.14§df=3 | 13.14‡ |
| **Age in Years (Mean [SD])** | 64.9 (12.6) | 64.9 (12.3) | 64.7 (13.3) | 59.7 (13.0) | **F(2, 4,190)** 37.54† | **t (3,690)** 0.22 | **t (3,834)** 8.69† |
| **Rx Risk Score**  **First Quartile**  **Second Quartile**  **Third Quartile**  **Fourth Quartile** | 1,024 (24.4)  1,077 (25.7)  1,040 (24.8)  1,052 (25.1) | 810 (24.3)  895 (26.8)  838 (25.2)  792 (23.7) | 89 (24.9)  66 (18.5)  95 (26.6)  107 (30.0) | 125 (25.0)  116 (23.1)  107 (21.4)  153 (30.5) | 25.02†  df = 6 | 14.10‡  df = 3 | 12.99‡  df = 3 |
| **Diabetes Complications**  **0**  **1**  **2**  **3**  **4+** | 1,312 (31.3)  1,333 (31.8)  802 (19.1)  423 (10.1)  323 (7.7) | 1,094 (32.8)  1,078 (32.3)  619 (18.6)  329 (9.9)  215 (6.4) | 91 (25.5)  106 (29.7)  80 (22.4)  35 (9.8)  45 (12.6) | 127 (25.3)  149 (29.7)  103 (20.6)  59 (11.8)  63 (12.6) | 51.51†  df = 8 | 25.96†  df = 4 | 33.58†  df = 4 |
| **HbA1c Level Groups**  **< 8.00%**  **> 8.00%** | 2,667 (63.6)  1,526 (36.4) | 2,179 (65.3)  1,156 (34.7) | 220 (61.6)  137 (38.4) | 268 (53.5)  233 (46.5) | 27.06† | 1.79 | 25.94† |
| **Duration of Diabetes in years**  **> 5**  **> 5 – 9.9**  **> 10.0** | 1,541 (36.8)  1,097 (26.2)  1,548 (37.0) | 1,269 (38.1)  872 (26.2)  1,189 (35.7) | 107 (30.1)  103 (28.9)  146 (41.0) | 165 (33.0)  122 (24.4)  213 (42.6) | 16.84‡  df = 4 | 9.00‡  df = 2 | 9.21‡  df = 2 |

Table 1: Depression and Demographic Characteristics by Depression Grouping *Continued*

| **Variables** | **Total Sample** | **No Depression** | **Minor Depression** | **Major Depression** | **Overall Test Statistics** | **Minor vs. None** | **Major vs. None** |
| --- | --- | --- | --- | --- | --- | --- | --- |
|  | **N = 4,193***  **n (%)** | **N = 3,335 (79.5%)**  **n (%)** | **N = 357 (8.5%) n (%)** | **N = 501 (12%)**  **n (%)** | **Chi Square**  **df = 2** | **Chi Square df = 1** | **Chi Square df = 1** |
| **BMI**  **< 30.0 kg/m2**  **> 30.0 kg/m2** | 2,055 (49.7)  2,077 (50.3) | 1,736 (52.8)  1,552 (47.2) | 157 (44.7)  194 (55.3) | 162 (32.9)  331 (67.1) | 72.02† | 7.95‡ | 67.38† |
| **Smoking Currently** | 357 (8.7) | 238 (7.3) | 37 (10.5) | 82 (16.7) | 49.66† | 4.44* | 47.63† |
| **Treatment Intensity**  **None or Diet**  **Oral Hypoglycemic**  **Insulin or Insulin+ Oral Hypoglycemic** | 1,076 (25.7)  1,973 (47.0)  1,144 (27.3) | 910 (27.3)  1,607 (48.2)  818 (24.5) | 79 (22.1)  160 (44.8)  118 (33.1) | 87 (17.4)  206 (41.1)  208 (41.5) | 74.48†  df = 4 | 13.21†  df = 2 | 68.10†  df = 2 |

Data are n (%), except for Age in Years, which is mean ± SD.
*Sample size may vary with 10% missing data. df = 1 unless otherwise indicated; † *P* > 0.001; ‡ *P* < 0.01; § *P* < 0.05
